# Supplementary material for: Effects of boosted mRNA and adenoviral-vectored vaccines on immune responses to omicron BA.1 and BA.2 following the heterologous CoronaVac/AZD1222 vaccination
Source: bioRxiv or medRxiv preprint supplement (doi:10.1101/2022.04.25.22274294), 2022-04-28
Supplement: Supplementary file [file media-1.pdf]

## Supplementary Information

### Heterologous CoronaVac/AZD1222 (one month vs 4-5 months)

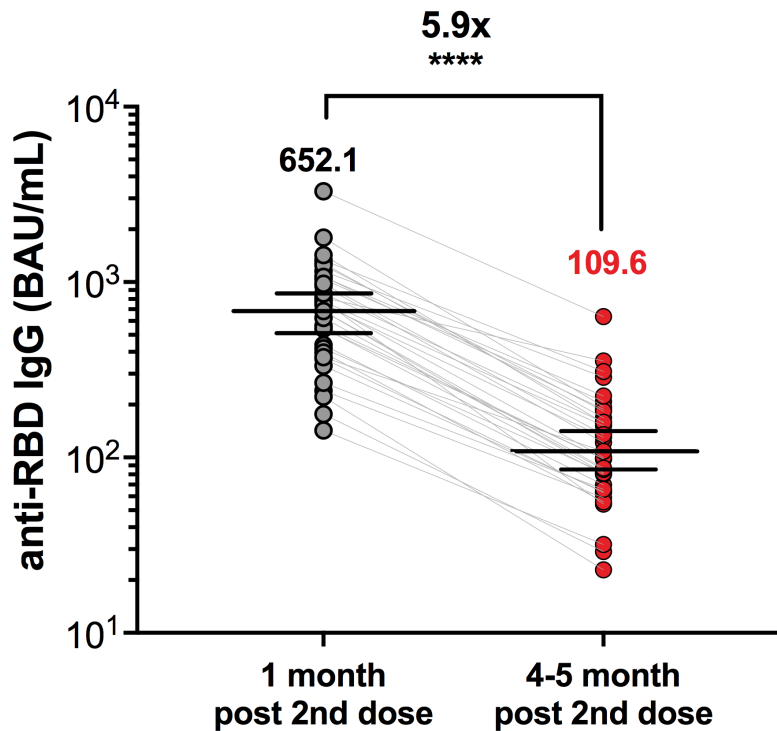

**Supplementary Figure 1.** Vaccine-induced immunity wane in individuals who received heterologous CoronaVac/AZD1222 vaccination. Pair serum samples (n=35) at one-month post-vaccination obtained from our previous report [23] were compared to 4-5 months post-vaccination from current study. Numbers above the column indicate the geometric mean titers (GMT). Error bars indicate the GMT with 95% CIs and fold-reduction is denoted. The comparison was performed using a t-test based on log-transformed data. \*\*\*\*p < 0.001.

Boosted vaccines ● AZD1222 ● BNT162b2 ● mRNA-1273

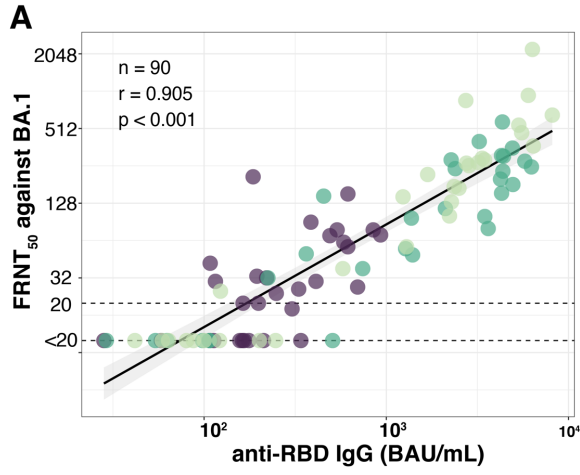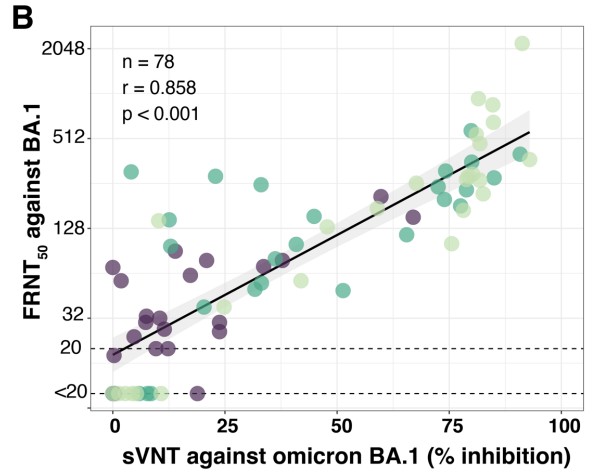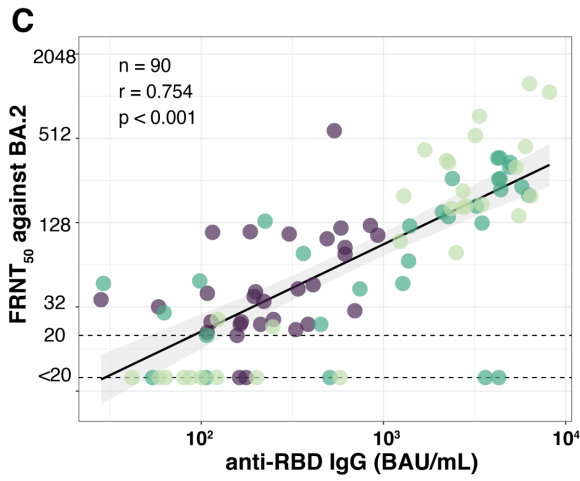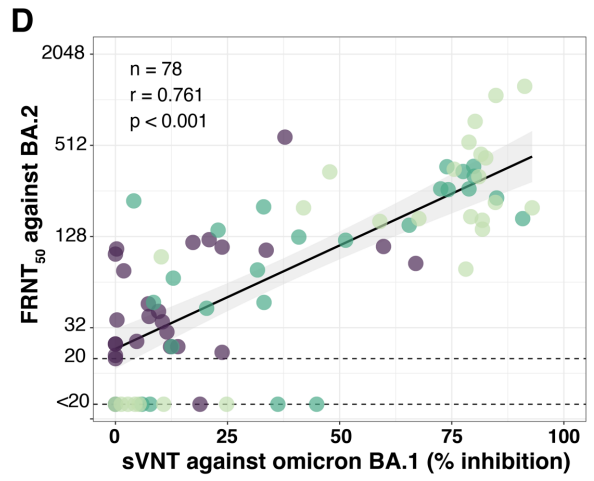

**Supplementary Figure 2.** Correlation between neutralizing antibody titers against omicron subvariants tested using a live virus neutralization test (FRNT50) and serological testing. Correlation between FRNT50 against BA.1 and anti-RBD IgG (RBD from the ancestral strain) (Panel A), FRNT50 against BA.1 and sVNT against BA.1 (Panel B), FRNT50 against BA.2 and anti-RBD IgG (Panel C), FRNT50 against BA.2 and sVNT against BA.1 (Panel D) were analyzed. For neutralizing antibody titers (FRNT50 titers), the value  $<20$  was defined as undetectable and set as a FRNT50 of 10 (dotted lines). For anti-RBD IgG, the value  $\geq 7.1$  BAU/mL was defined as a positive response. The cut-off for sVNT was 30 % inhibition. Spearman rank correlation test was calculated based on log-transform data. BAU = binding arbitrary units, FRNT50 = foci reduction neutralization titer – 50%.

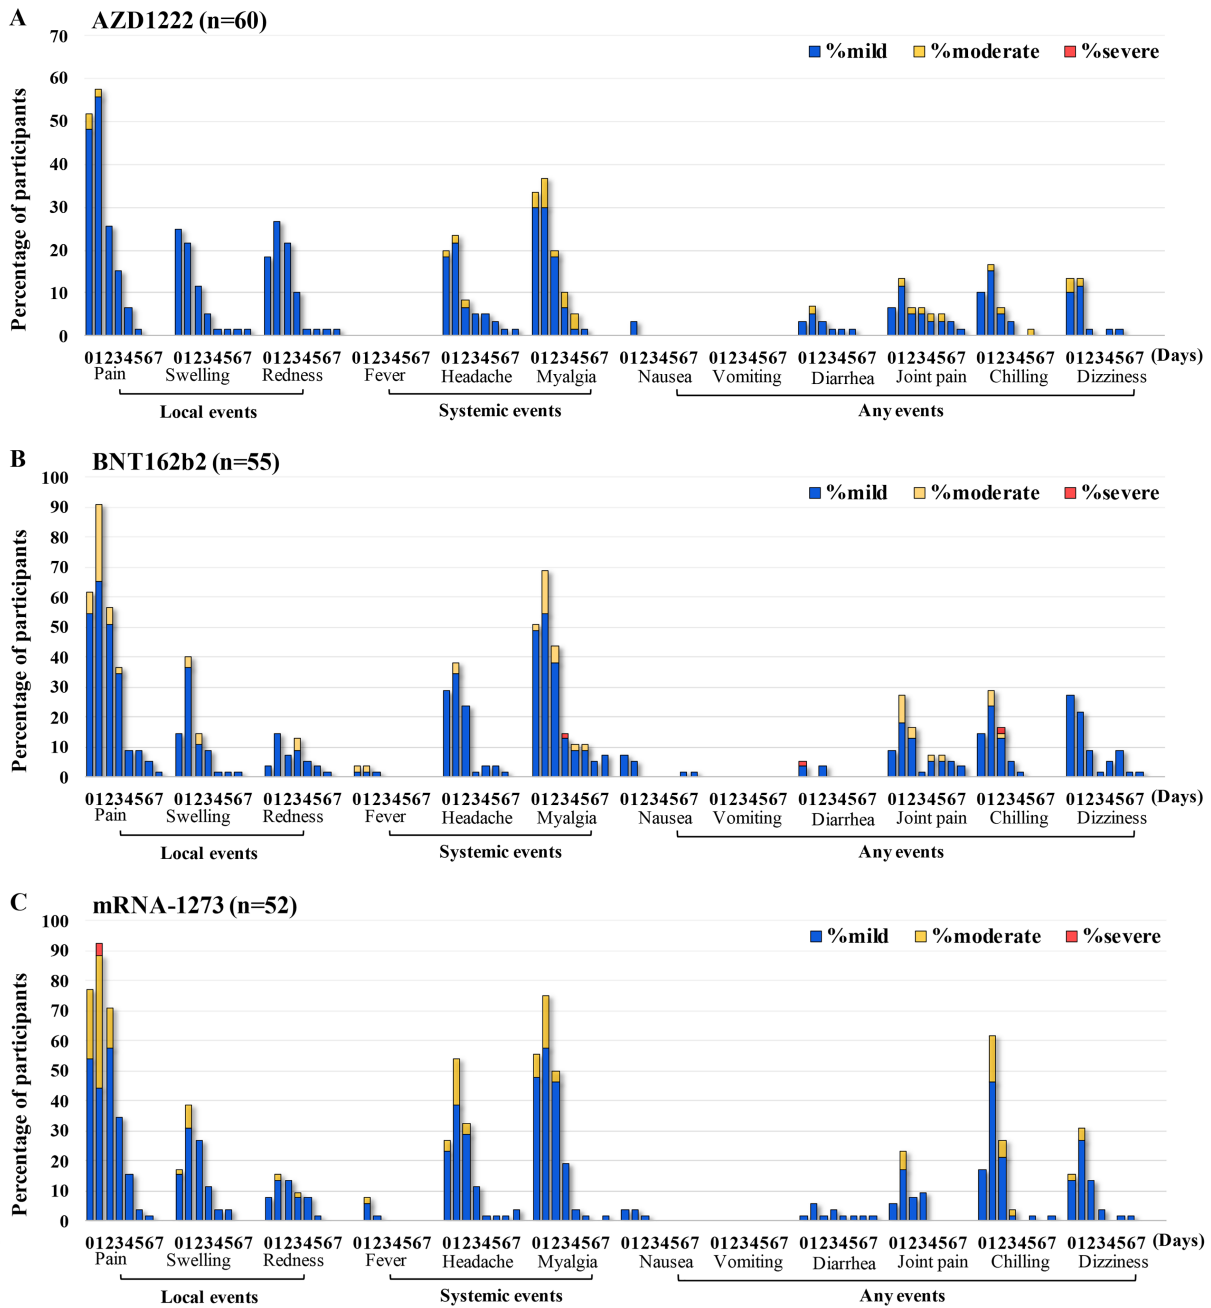

**Supplementary Figure 3. Solicited local and systemic adverse events within seven days after third dose vaccination in individuals who previously received heterologous CoronaVac/AZD1222 vaccination.** Bar graphs present adverse events following the third dose vaccination in 167 participants who received AZD1222 ( $n = 60$ ) (Panel A), BNT162b2 ( $n = 55$ )

**(Panel B)** and mRNA-1273 ( $n=52$ ) **(Panel C)**. Day 1 is the day of the third dose of vaccination. Fever was classified as mild ( $38\text{ }^{\circ}\text{C}$  to  $<38.5\text{ }^{\circ}\text{C}$ ), moderate ( $38.5\text{ }^{\circ}\text{C}$  to  $<39\text{ }^{\circ}\text{C}$ ), and severe ( $\geq 39\text{ }^{\circ}\text{C}$ ). The swelling was graded as mild ( $<5\text{ cm}$ ), moderate ( $5\text{ cm}$  to  $<10\text{ cm}$ ), and severe ( $\geq 10\text{ cm}$ ). Symptoms were graded as follows: mild, no limitation on normal activity; moderate, some limitation of daily activity; and severe, unable to perform or daily activity prevented.
